# Supplementary material for: Acceleration and sprint profiles of professional male football players in relation to playing position
Source: PubMed Central journal article supplement (PMC7410317; doi:10.1371/journal.pone.0236959), 2020-08-06
Supplement: pone.0236959.s001.pdf [file pone.0236959.s001.pdf]

## SUPPORTING INFORMATION

| ANOVA                |                |                |     |             |        |       |
|----------------------|----------------|----------------|-----|-------------|--------|-------|
|                      |                | Sum of Squares | df  | Mean Square | F      | Sig.  |
| ACC <sub>DIS</sub>   | Between Groups | 443093.356     | 4   | 110773.339  | 13.633 | 0.001 |
|                      | Within Groups  | 934433.152     | 115 | 8125.506    |        |       |
|                      | Total          | 1377526.508    | 119 |             |        |       |
| ACC <sub>LOW</sub>   | Between Groups | 64099.336      | 4   | 16024.834   | 5.933  | 0.001 |
|                      | Within Groups  | 310588.589     | 115 | 2700.770    |        |       |
|                      | Total          | 374687.925     | 119 |             |        |       |
| DEC <sub>LOW</sub>   | Between Groups | 38427.071      | 4   | 9606.768    | 3.959  | 0.005 |
|                      | Within Groups  | 279081.729     | 115 | 2426.798    |        |       |
|                      | Total          | 317508.800     | 119 |             |        |       |
| DIFF <sub>ACDC</sub> | Between Groups | 554.765        | 4   | 138.691     | 1.153  | 0.335 |
|                      | Within Groups  | 13831.027      | 115 | 120.270     |        |       |
|                      | Total          | 14385.792      | 119 |             |        |       |
| Sprint time          | Between Groups | 4.294          | 4   | 1.073       | 2.176  | 0.076 |
|                      | Within Groups  | 56.741         | 115 | 0.493       |        |       |
|                      | Total          | 61.035         | 119 |             |        |       |
| V <sub>max</sub>     | Between Groups | 161.272        | 4   | 40.318      | 14.479 | 0.001 |
|                      | Within Groups  | 320.232        | 115 | 2.785       |        |       |
|                      | Total          | 481.504        | 119 |             |        |       |

## DESCRIPTIVE STATISTICS AND MULTIPLE COMPARISONS

### ACC<sub>DIS</sub> descriptive statistics

| <b>Position</b> | <b>N</b> | <b>Mean</b> | <b>SD</b> |
|-----------------|----------|-------------|-----------|
| CD              | 24       | 290.81      | 76.03     |
| FW              | 24       | 333.64      | 118.06    |
| WMF             | 24       | 436.52      | 86.32     |
| FB              | 22       | 351.26      | 99.28     |
| MF              | 26       | 260.72      | 64.05     |

### ACC<sub>DIS</sub> multiple comparisons

| <b>Position Groups</b> | <b>Mean difference</b> | <b>Sig.</b> | <b>ES</b> |
|------------------------|------------------------|-------------|-----------|
| CD vs FW               | -42.82                 | 1.000       | 0.43      |
| CD vs WMF              | -145.70                | 0.001       | 1.79      |
| CD vs FB               | -60.44                 | 0.250       | 0.69      |
| CD vs MF               | 30.10                  | 1.000       | 0.43      |
| FW vs CD               | 42.82                  | 1.000       | 0.43      |
| FW vs WMF              | -102.88                | 0.001       | 0.99      |
| FW vs FB               | -17.62                 | 1.000       | 0.16      |
| FW vs MF               | 72.92                  | 0.051       | 0.78      |
| WMF vs CD              | 145.70                 | 0.001       | 1.79      |
| WMF vs FW              | 102.88                 | 0.001       | 0.99      |
| WMF vs FB              | 85.26                  | 0.018       | 0.92      |
| WMF vs MF              | 175.80                 | 0.001       | 2.33      |
| FB vs CD               | 60.44                  | 0.250       | 0.69      |
| FB vs FW               | 17.62                  | 1.000       | 0.16      |
| FB vs WMF              | -85.26                 | 0.018       | 0.92      |
| FB vs MF               | 90.54                  | 0.007       | 1.10      |
| MF vs CD               | -30.10                 | 1.000       | 0.43      |
| MF vs FW               | -72.92                 | 0.051       | 0.78      |
| MF vs WMF              | -175.80                | 0.001       | 2.33      |
| MF vs FB               | -90.54                 | 0.007       | 1.10      |

### DEC<sub>DIS</sub> descriptive statistics

| <b>Position</b> | <b>N</b> | <b>Mean</b> | <b>SD</b> |
|-----------------|----------|-------------|-----------|
| CD              | 24       | 229.99      | 43.01     |
| FW              | 24       | 259.22      | 55.96     |
| WMF             | 24       | 334.39      | 74.46     |
| FB              | 22       | 271.23      | 66.32     |
| MF              | 26       | 228.66      | 54.54     |

### DEC<sub>DIS</sub> multiple comparisons

| <b>Position Groups</b> | <b>Mean difference</b> | <b>Sig.</b> | <b>ES</b> |
|------------------------|------------------------|-------------|-----------|
| CD vs FW               | -29.22                 | 0.747       | 0.59      |
| CD vs WMF              | -104.39                | 0.001       | 1.72      |
| CD vs FB               | -41.24                 | 0.443       | 0.74      |
| CD vs MF               | 1.33                   | 1.000       | 0.03      |
| FW vs CD               | 29.22                  | 0.747       | 0.59      |
| FW vs WMF              | -75.17                 | 0.032       | 1.14      |
| FW vs FB               | -12.01                 | 1.000       | 0.20      |
| FW vs MF               | 30.56                  | 0.693       | 0.55      |
| WMF vs CD              | 104.39                 | 0.001       | 1.72      |
| WMF vs FW              | 75.17                  | 0.032       | 1.14      |
| WMF vs FB              | 63.16                  | 0.088       | 0.89      |
| WMF vs MF              | 105.73                 | 0.001       | 1.63      |
| FB vs CD               | 41.24                  | 0.443       | 0.74      |
| FB vs FW               | 12.01                  | 1.000       | 0.20      |
| FB vs WMF              | -63.16                 | 0.088       | 0.89      |
| FB vs MF               | 42.57                  | 0.405       | 0.71      |
| MF vs CD               | -1.33                  | 1.000       | 0.03      |
| MF vs FW               | -30.56                 | 0.693       | 0.55      |
| MF vs WMF              | -105.73                | 0.001       | 1.63      |
| MF vs FB               | -42.57                 | 0.405       | 0.71      |

### ACC<sub>Low</sub> descriptive statistics

| <b>Position</b> | <b>N</b> | <b>Mean</b> | <b>SD</b> |
|-----------------|----------|-------------|-----------|
| CD              | 24       | 354.67      | 54.49     |
| FW              | 24       | 351.71      | 46.22     |
| WMF             | 24       | 343.79      | 48.03     |
| FB              | 22       | 378.05      | 45.84     |
| MF              | 26       | 405.85      | 61.97     |

### ACC<sub>Low</sub> multiple comparisons

| <b>Position Groups</b> | <b>Mean difference</b> | <b>Sig.</b> | <b>ES</b> |
|------------------------|------------------------|-------------|-----------|
| CD vs FW               | 2.96                   | 1.000       | 0.06      |
| CD vs WMF              | 10.88                  | 1.000       | 0.21      |
| CD vs FB               | -23.38                 | 1.000       | 0.46      |
| CD vs MF               | -51.17                 | 0.007       | 0.87      |
| FW vs CD               | -2.96                  | 1.000       | 0.06      |
| FW vs WMF              | 7.92                   | 1.000       | 0.17      |
| FW vs FB               | -26.34                 | 0.887       | 0.57      |
| FW vs MF               | -54.13                 | 0.004       | 0.98      |
| WMF vs CD              | -10.88                 | 1.000       | 0.21      |
| WMF vs FW              | -7.92                  | 1.000       | 0.17      |
| WMF vs FB              | -34.25                 | 0.275       | 0.73      |
| WMF vs MF              | -62.05                 | 0.001       | 1.11      |
| FB vs CD               | 23.38                  | 1.000       | 0.46      |
| FB vs FW               | 26.34                  | 0.887       | 0.57      |
| FB vs WMF              | 34.25                  | 0.275       | 0.73      |
| FB vs MF               | -27.80                 | 0.674       | 0.50      |
| MF vs CD               | 51.17                  | 0.007       | 0.87      |
| MF vs FW               | 54.13                  | 0.004       | 0.98      |
| MF vs WMF              | 62.05                  | 0.001       | 1.11      |
| MF vs FB               | 27.80                  | 0.674       | 0.50      |

### ACC<sub>HIGH</sub> descriptive statistics

| Position | N  | Mean  | SD   |
|----------|----|-------|------|
| CD       | 24 | 26.45 | 6.05 |
| FW       | 24 | 29.91 | 9.56 |
| WMF      | 24 | 34.91 | 6.65 |
| FB       | 22 | 30.40 | 7.55 |
| MF       | 26 | 27.07 | 5.46 |

### ACC<sub>HIGH</sub> multiple comparisons

| Position Groups | Mean difference | Sig.  | ES   |
|-----------------|-----------------|-------|------|
| CD vs FW        | -3.46           | 0.975 | 0.43 |
| CD vs WMF       | -8.46           | 0.001 | 1.32 |
| CD vs FB        | -3.95           | 0.645 | 0.58 |
| CD vs MF        | -0.62           | 1.000 | 0.11 |
| FW vs CD        | 3.46            | 0.975 | 0.43 |
| FW vs WMF       | -5.00           | 0.173 | 0.61 |
| FW vs FB        | -0.49           | 1.000 | 0.06 |
| FW vs MF        | 2.84            | 1.000 | 0.37 |
| WMF vs CD       | 8.46            | 0.001 | 1.32 |
| WMF vs FW       | 5.00            | 0.173 | 0.61 |
| WMF vs FB       | 4.51            | 0.354 | 0.63 |
| WMF vs MF       | 7.84            | 0.002 | 1.29 |
| FB vs CD        | 3.95            | 0.645 | 0.57 |
| FB vs FW        | 0.49            | 1.000 | 0.06 |
| FB vs WMF       | -4.51           | 0.354 | 0.63 |
| FB vs MF        | 3.33            | 1.000 | 0.51 |
| MF vs CD        | 0.62            | 1.000 | 0.10 |
| MF vs FW        | -2.84           | 1.000 | 0.37 |
| MF vs WMF       | -7.84           | 0.002 | 1.29 |
| MF vs FB        | -3.33           | 1.000 | 0.51 |

### DEC<sub>Low</sub> descriptive statistics

| <b>Position</b> | <b>N</b> | <b>Mean</b> | <b>SD</b> |
|-----------------|----------|-------------|-----------|
| CD              | 24       | 355.96      | 46.87     |
| FW              | 24       | 340.67      | 40.09     |
| WMF             | 24       | 343.50      | 51.22     |
| FB              | 22       | 371.64      | 45.87     |
| MF              | 26       | 387.42      | 59.02     |

### DEC<sub>Low</sub> multiple comparisons

| <b>Position Groups</b> | <b>Mean difference</b> | <b>Sig.</b> | <b>ES</b> |
|------------------------|------------------------|-------------|-----------|
| CD vs FW               | 15.29                  | 1.000       | 0.35      |
| CD vs WMF              | 12.46                  | 1.000       | 0.25      |
| CD vs FB               | -15.68                 | 1.000       | 0.34      |
| CD vs MF               | -31.46                 | 0.259       | 0.59      |
| FW vs CD               | -15.29                 | 1.000       | 0.35      |
| FW vs WMF              | -2.83                  | 1.000       | 0.06      |
| FW vs FB               | -30.97                 | 0.353       | 0.72      |
| FW vs MF               | -46.75                 | 0.011       | 0.92      |
| WMF vs CD              | -12.46                 | 1.000       | 0.25      |
| WMF vs FW              | 2.83                   | 1.000       | 0.06      |
| WMF vs FB              | -28.14                 | 0.554       | 0.58      |
| WMF vs MF              | -43.92                 | 0.021       | 0.79      |
| FB vs CD               | 15.68                  | 1.000       | 0.34      |
| FB vs FW               | 30.97                  | 0.353       | 0.72      |
| FB vs WMF              | 28.14                  | 0.554       | 0.58      |
| FB vs MF               | -15.79                 | 1.000       | 0.30      |
| MF vs CD               | 31.46                  | 0.259       | 0.59      |
| MF vs FW               | 46.75                  | 0.011       | 0.92      |
| MF vs WMF              | 43.92                  | 0.021       | 0.79      |
| MF vs FB               | 15.79                  | 1.000       | 0.30      |

### DEC<sub>HIGH</sub> descriptive statistics

| <b>Position</b> | <b>N</b> | <b>Mean</b> | <b>SD</b> |
|-----------------|----------|-------------|-----------|
| CD              | 24       | 50.88       | 8.60      |
| FW              | 24       | 55.25       | 12.08     |
| WMF             | 24       | 64.46       | 15.83     |
| FB              | 22       | 54.14       | 13.27     |
| MF              | 26       | 54.77       | 12.39     |

### DEC<sub>HIGH</sub> multiple comparisons

| <b>Position Groups</b> | <b>Mean difference</b> | <b>Sig.</b> | <b>ES</b> |
|------------------------|------------------------|-------------|-----------|
| CD vs FW               | -4.38                  | 1.000       | 0.42      |
| CD vs WMF              | -13.58                 | 0.011       | 1.07      |
| CD vs FB               | -3.26                  | 1.000       | 0.29      |
| CD vs MF               | -3.89                  | 1.000       | 0.36      |
| FW vs CD               | 4.38                   | 1.000       | 0.42      |
| FW vs WMF              | -9.21                  | 0.586       | 0.65      |
| FW vs FB               | 1.11                   | 1.000       | 0.09      |
| FW vs MF               | 0.48                   | 1.000       | 0.04      |
| WMF vs CD              | 13.58                  | 0.011       | 1.07      |
| WMF vs FW              | 9.21                   | 0.586       | 0.65      |
| WMF vs FB              | 10.32                  | 0.247       | 0.70      |
| WMF vs MF              | 9.69                   | 0.291       | 0.68      |
| FB vs CD               | 3.26                   | 1.000       | 0.29      |
| FB vs FW               | -1.11                  | 1.000       | 0.09      |
| FB vs WMF              | -10.32                 | 0.247       | 0.70      |
| FB vs MF               | -0.63                  | 1.000       | 0.05      |
| MF vs CD               | 3.89                   | 1.000       | 0.36      |
| MF vs FW               | -0.48                  | 1.000       | 0.04      |
| MF vs WMF              | -9.69                  | 0.291       | 0.68      |
| MF vs FB               | 0.63                   | 1.000       | 0.05      |

### **DIFF<sub>ACDC</sub> descriptive statistics**

| <b>Position</b> | <b>N</b> | <b>Mean</b> | <b>SD</b> |
|-----------------|----------|-------------|-----------|
| CD              | 24       | -24.42      | 7.79      |
| FW              | 24       | -25.33      | 10.04     |
| WMF             | 24       | -29.54      | 13.51     |
| FB              | 22       | -23.73      | 11.04     |
| MF              | 26       | -27.69      | 11.59     |

### **DIFF<sub>ACDC</sub> multiple comparisons**

| <b>Position Groups</b> | <b>Mean difference</b> | <b>Sig.</b> | <b>ES</b> |
|------------------------|------------------------|-------------|-----------|
| CD vs FW               | 0.92                   | 1.000       | 0.10      |
| CD vs WMF              | 5.13                   | 1.000       | 0.46      |
| CD vs FB               | -0.69                  | 1.000       | 0.07      |
| CD vs MF               | 3.28                   | 1.000       | 0.33      |
| FW vs CD               | -0.92                  | 1.000       | 0.10      |
| FW vs WMF              | 4.21                   | 1.000       | 0.35      |
| FW vs FB               | -1.61                  | 1.000       | 0.15      |
| FW vs MF               | 2.36                   | 1.000       | 0.22      |
| WMF vs CD              | -5.13                  | 1.000       | 0.46      |
| WMF vs FW              | -4.21                  | 1.000       | 0.35      |
| WMF vs FB              | -5.81                  | 0.751       | 0.47      |
| WMF vs MF              | -1.85                  | 1.000       | 0.15      |
| FB vs CD               | 0.69                   | 1.000       | 0.07      |
| FB vs FW               | 1.61                   | 1.000       | 0.15      |
| FB vs WMF              | 5.81                   | 0.751       | 0.47      |
| FB vs MF               | 3.97                   | 1.000       | 0.35      |
| MF vs CD               | -3.28                  | 1.000       | 0.33      |
| MF vs FW               | -2.36                  | 1.000       | 0.22      |
| MF vs WMF              | 1.85                   | 1.000       | 0.15      |
| MF vs FB               | -3.97                  | 1.000       | 0.35      |



### ACC<sub>AVG</sub> descriptive statistics

| <b>Position</b> | <b>N</b> | <b>Mean</b> | <b>SD</b> |
|-----------------|----------|-------------|-----------|
| CD              | 24       | 0.56        | 0.06      |
| FW              | 24       | 0.54        | 0.07      |
| WMF             | 24       | 0.55        | 0.07      |
| FB              | 22       | 0.55        | 0.06      |
| MF              | 26       | 0.56        | 0.10      |

### ACC<sub>AVG</sub> multiple comparisons

| <b>Position Groups</b> | <b>Mean difference</b> | <b>Sig.</b> | <b>ES</b> |
|------------------------|------------------------|-------------|-----------|
| CD vs FW               | 0.01                   | 0.556       | 0.18      |
| CD vs WMF              | 0.01                   | 0.556       | 0.08      |
| CD vs FB               | 0.00                   | 0.556       | 0.06      |
| CD vs MF               | -0.01                  | 0.556       | 0.08      |
| FW vs CD               | -0.01                  | 0.556       | 0.18      |
| FW vs WMF              | -0.01                  | 0.556       | 0.10      |
| FW vs FB               | -0.01                  | 0.556       | 0.13      |
| FW vs MF               | -0.02                  | 0.556       | 0.22      |
| WMF vs CD              | -0.01                  | 0.556       | 0.08      |
| WMF vs FW              | 0.01                   | 0.556       | 0.10      |
| WMF vs FB              | 0.00                   | 0.556       | 0.03      |
| WMF vs MF              | -0.01                  | 0.556       | 0.14      |
| FB vs CD               | 0.00                   | 0.556       | 0.06      |
| FB vs FW               | 0.01                   | 0.556       | 0.13      |
| FB vs WMF              | 0.00                   | 0.556       | 0.03      |
| FB vs MF               | -0.01                  | 0.556       | 0.13      |
| MF vs CD               | 0.01                   | 0.556       | 0.08      |
| MF vs FW               | 0.02                   | 0.556       | 0.22      |
| MF vs WMF              | 0.01                   | 0.556       | 0.14      |
| MF vs FB               | 0.01                   | 0.556       | 0.13      |

### DEC<sub>AVG</sub> descriptive statistics

| <b>Position</b> | <b>N</b> | <b>Mean</b> | <b>SD</b> |
|-----------------|----------|-------------|-----------|
| CD              | 24       | -0.60       | 0.06      |
| FW              | 24       | -0.58       | 0.08      |
| WMF             | 24       | -0.60       | 0.08      |
| FB              | 22       | -0.60       | 0.07      |
| MF              | 26       | -0.60       | 0.10      |

### DEC<sub>AVG</sub> multiple comparisons

| <b>Position Groups</b> | <b>Mean difference</b> | <b>Sig.</b> | <b>ES</b> |
|------------------------|------------------------|-------------|-----------|
| CD vs FW               | -0.01                  | 0.756       | 0.21      |
| CD vs WMF              | 0.01                   | 0.756       | 0.08      |
| CD vs FB               | 0.00                   | 0.756       | 0.06      |
| CD vs MF               | 0.00                   | 0.756       | 0.01      |
| FW vs CD               | 0.01                   | 0.756       | 0.21      |
| FW vs WMF              | 0.02                   | 0.756       | 0.26      |
| FW vs FB               | 0.01                   | 0.756       | 0.15      |
| FW vs MF               | 0.02                   | 0.756       | 0.17      |
| WMF vs CD              | -0.01                  | 0.756       | 0.08      |
| WMF vs FW              | -0.02                  | 0.756       | 0.26      |
| WMF vs FB              | -0.01                  | 0.756       | 0.13      |
| WMF vs MF              | 0.00                   | 0.756       | 0.05      |
| FB vs CD               | 0.00                   | 0.756       | 0.06      |
| FB vs FW               | -0.01                  | 0.756       | 0.15      |
| FB vs WMF              | 0.01                   | 0.756       | 0.13      |
| FB vs MF               | 0.00                   | 0.756       | 0.05      |
| MF vs CD               | 0.00                   | 0.756       | 0.01      |
| MF vs FW               | -0.02                  | 0.756       | 0.17      |
| MF vs WMF              | 0.00                   | 0.756       | 0.05      |
| MF vs FB               | 0.00                   | 0.756       | 0.05      |

### ACC<sub>MAX</sub> descriptive statistics

| <b>Position</b> | <b>N</b> | <b>Mean</b> | <b>SD</b> |
|-----------------|----------|-------------|-----------|
| CD              | 24.00    | 4.46        | 0.40      |
| FW              | 24.00    | 4.53        | 0.62      |
| WMF             | 24.00    | 4.70        | 0.31      |
| FB              | 22.00    | 4.48        | 0.36      |
| MF              | 26.00    | 4.39        | 0.63      |

### ACC<sub>MAX</sub> multiple comparisons

| <b>Position Groups</b> | <b>Mean difference</b> | <b>Sig.</b> | <b>ES</b> |
|------------------------|------------------------|-------------|-----------|
| CD vs FW               | -0.07                  | 1.000       | 0.14      |
| CD vs WMF              | -0.24                  | 0.267       | 0.67      |
| CD vs FB               | -0.02                  | 1.000       | 0.06      |
| CD vs MF               | 0.07                   | 1.000       | 0.13      |
| FW vs CD               | 0.07                   | 1.000       | 0.14      |
| FW vs WMF              | -0.16                  | 1.000       | 0.34      |
| FW vs FB               | 0.05                   | 1.000       | 0.10      |
| FW vs MF               | 0.14                   | 1.000       | 0.23      |
| WMF vs CD              | 0.24                   | 0.267       | 0.67      |
| WMF vs FW              | 0.16                   | 1.000       | 0.34      |
| WMF vs FB              | 0.22                   | 0.530       | 0.64      |
| WMF vs MF              | 0.31                   | 0.001       | 0.61      |
| FB vs CD               | 0.02                   | 1.000       | 0.06      |
| FB vs FW               | -0.05                  | 1.000       | 0.10      |
| FB vs WMF              | -0.22                  | 0.530       | 0.64      |
| FB vs MF               | 0.09                   | 0.778       | 0.18      |
| MF vs CD               | -0.07                  | 1.000       | 0.13      |
| MF vs FW               | -0.14                  | 1.000       | 0.23      |
| MF vs WMF              | -0.31                  | 0.001       | 0.61      |
| MF vs FB               | -0.09                  | 0.778       | 0.18      |

### DEC<sub>MAX</sub> descriptive statistics

| <b>Position</b> | <b>N</b> | <b>Mean</b> | <b>SD</b> |
|-----------------|----------|-------------|-----------|
| CD              | 24.00    | -5.73       | 0.52      |
| FW              | 24.00    | -6.33       | 0.98      |
| WMF             | 24.00    | -6.20       | 0.89      |
| FB              | 22.00    | -6.07       | 0.57      |
| MF              | 26.00    | -5.80       | 0.80      |

### DEC<sub>MAX</sub> multiple comparisons

| <b>Position Groups</b> | <b>Mean difference</b> | <b>Sig.</b> | <b>ES</b> |
|------------------------|------------------------|-------------|-----------|
| CD vs FW               | 0.60                   | 0.036       | 0.77      |
| CD vs WMF              | 0.47                   | 0.079       | 0.65      |
| CD vs FB               | 0.34                   | 0.093       | 0.62      |
| CD vs MF               | 0.07                   | 0.834       | 0.11      |
| FW vs CD               | -0.60                  | 0.036       | 0.77      |
| FW vs WMF              | -0.13                  | 0.729       | 0.14      |
| FW vs FB               | -0.27                  | 0.706       | 0.33      |
| FW vs MF               | -0.53                  | 0.119       | 0.60      |
| WMF vs CD              | -0.47                  | 0.079       | 0.65      |
| WMF vs FW              | 0.13                   | 0.729       | 0.14      |
| WMF vs FB              | -0.13                  | 0.969       | 0.18      |
| WMF vs MF              | -0.40                  | 0.046       | 0.47      |
| FB vs CD               | -0.34                  | 0.093       | 0.62      |
| FB vs FW               | 0.27                   | 0.706       | 0.33      |
| FB vs WMF              | 0.13                   | 0.969       | 0.18      |
| FB vs MF               | -0.27                  | 0.056       | 0.38      |
| MF vs CD               | -0.07                  | 0.834       | 0.11      |
| MF vs FW               | 0.53                   | 0.119       | 0.60      |
| MF vs WMF              | 0.40                   | 0.046       | 0.47      |
| MF vs FB               | 0.27                   | 0.056       | 0.38      |

### SPA descriptive statistics

| <b>Position</b> | <b>N</b> | <b>Mean</b> | <b>SD</b> |
|-----------------|----------|-------------|-----------|
| CD              | 24.00    | 8.58        | 3.72      |
| FW              | 24.00    | 8.71        | 3.13      |
| WMF             | 24.00    | 15.88       | 4.73      |
| FB              | 22.00    | 11.68       | 3.97      |
| MF              | 26.00    | 4.62        | 2.99      |

### SPA multiple comparisons

| <b>Position Groups</b> | <b>Mean difference</b> | <b>Sig.</b> | <b>ES</b> |
|------------------------|------------------------|-------------|-----------|
| CD vs FW               | -0.13                  | 1.000       | 0.04      |
| CD vs WMF              | -7.29                  | 0.001       | 1.71      |
| CD vs FB               | -3.10                  | 0.289       | 0.81      |
| CD vs MF               | 3.96                   | 0.030       | 1.18      |
| FW vs CD               | 0.13                   | 1.000       | 0.04      |
| FW vs WMF              | -7.16                  | 0.001       | 1.79      |
| FW vs FB               | -2.97                  | 0.353       | 0.84      |
| FW vs MF               | 4.09                   | 0.023       | 1.34      |
| WMF vs CD              | 7.29                   | 0.001       | 1.71      |
| WMF vs FW              | 7.16                   | 0.001       | 1.79      |
| WMF vs FB              | 4.19                   | 0.389       | 0.96      |
| WMF vs MF              | 11.25                  | 0.001       | 2.87      |
| FB vs CD               | 3.10                   | 0.289       | 0.81      |
| FB vs FW               | 2.97                   | 0.353       | 0.84      |
| FB vs WMF              | -4.19                  | 0.389       | 0.96      |
| FB vs MF               | 7.06                   | 0.001       | 2.03      |
| MF vs CD               | -3.96                  | 0.030       | 1.18      |
| MF vs FW               | -4.09                  | 0.023       | 1.34      |
| MF vs WMF              | -11.25                 | 0.001       | 2.87      |
| MF vs FB               | -7.06                  | 0.001       | 2.03      |

### SPD descriptive statistics

| <b>Position</b> | <b>N</b> | <b>Mean</b> | <b>SD</b> |
|-----------------|----------|-------------|-----------|
| CD              | 24       | 148.99      | 73.08     |
| FW              | 24       | 165.30      | 58.11     |
| WMF             | 24       | 338.25      | 103.96    |
| FB              | 22       | 228.27      | 92.52     |
| MF              | 26       | 88.18       | 53.87     |

### SPD multiple comparisons

| <b>Position Groups</b> | <b>Mean difference</b> | <b>Sig.</b> | <b>ES</b> |
|------------------------|------------------------|-------------|-----------|
| CD vs FW               | -16.31                 | 1.000       | 0.24      |
| CD vs WMF              | -189.25                | 0.001       | 2.10      |
| CD vs FB               | -79.27                 | 0.140       | 0.95      |
| CD vs MF               | 60.82                  | 0.209       | 0.95      |
| FW vs CD               | 16.31                  | 1.000       | 0.24      |
| FW vs WMF              | -172.95                | 0.001       | 2.05      |
| FW vs FB               | -62.97                 | 0.763       | 0.82      |
| FW vs MF               | 77.12                  | 0.025       | 1.37      |
| WMF vs CD              | 189.25                 | 0.001       | 2.10      |
| WMF vs FW              | 172.95                 | 0.001       | 2.05      |
| WMF vs FB              | 109.98                 | 0.110       | 1.11      |
| WMF vs MF              | 250.07                 | 0.001       | 3.05      |
| FB vs CD               | 79.27                  | 0.140       | 0.95      |
| FB vs FW               | 62.97                  | 0.763       | 0.82      |
| FB vs WMF              | -109.98                | 0.110       | 1.11      |
| FB vs MF               | 140.09                 | 0.001       | 1.89      |
| MF vs CD               | -60.82                 | 0.209       | 0.95      |
| MF vs FW               | -77.12                 | 0.025       | 1.37      |
| MF vs WMF              | -250.07                | 0.001       | 3.05      |
| MF vs FB               | -140.09                | 0.001       | 1.89      |

### SPD<sub>AVG</sub> descriptive statistics

| <b>Position</b> | <b>N</b> | <b>Mean</b> | <b>SD</b> |
|-----------------|----------|-------------|-----------|
| CD              | 24       | 16.91       | 2.58      |
| FW              | 24       | 19.61       | 4.81      |
| WMF             | 24       | 21.59       | 3.75      |
| FB              | 22       | 19.15       | 3.18      |
| MF              | 25       | 20.05       | 7.72      |

### SPD<sub>AVG</sub> multiple comparisons

| <b>Position Groups</b> | <b>Mean difference</b> | <b>Sig.</b> | <b>ES</b> |
|------------------------|------------------------|-------------|-----------|
| CD vs FW               | -2.70                  | 0.255       | 0.70      |
| CD vs WMF              | -4.69                  | 0.001       | 1.45      |
| CD vs FB               | -2.24                  | 0.209       | 0.77      |
| CD vs MF               | -3.14                  | 1.000       | 0.54      |
| FW vs CD               | 2.70                   | 0.255       | 0.70      |
| FW vs WMF              | -1.98                  | 0.626       | 0.46      |
| FW vs FB               | 0.46                   | 1.000       | 0.11      |
| FW vs MF               | -0.44                  | 1.000       | 0.06      |
| WMF vs CD              | 4.69                   | 0.001       | 1.45      |
| WMF vs FW              | 1.98                   | 0.626       | 0.46      |
| WMF vs FB              | 2.44                   | 0.897       | 0.69      |
| WMF vs MF              | 1.55                   | 0.105       | 0.25      |
| FB vs CD               | 2.24                   | 0.209       | 0.77      |
| FB vs FW               | -0.46                  | 1.000       | 0.11      |
| FB vs WMF              | -2.44                  | 0.897       | 0.69      |
| FB vs MF               | -0.90                  | 1.000       | 0.14      |
| MF vs CD               | 3.14                   | 1.000       | 0.541     |
| MF vs FW               | 0.44                   | 1.000       | 0.06      |
| MF vs WMF              | -1.55                  | 0.105       | 0.25      |
| MF vs FB               | 0.90                   | 1.000       | 0.14      |

### Sprint time descriptive statistics

| <b>Position</b> | <b>N</b> | <b>Mean</b> | <b>SD</b> |
|-----------------|----------|-------------|-----------|
| CD              | 24       | 2.47        | 0.33      |
| FW              | 24       | 2.87        | 0.69      |
| WMF             | 24       | 3.05        | 0.46      |
| FB              | 22       | 2.79        | 0.41      |
| MF              | 26       | 2.84        | 1.18      |

### Sprint time descriptive statistics

| <b>Position Groups</b> | <b>Mean difference</b> | <b>Sig.</b> | <b>ES</b> |
|------------------------|------------------------|-------------|-----------|
| CD vs FW               | -0.41                  | 0.165       | 0.75      |
| CD vs WMF              | -0.58                  | 0.100       | 1.45      |
| CD vs FB               | -0.32                  | 0.115       | 0.86      |
| CD vs MF               | -0.37                  | 0.804       | 0.42      |
| FW vs CD               | 0.41                   | 0.165       | 0.75      |
| FW vs WMF              | -0.17                  | 1.000       | 0.30      |
| FW vs FB               | 0.09                   | 1.000       | 0.15      |
| FW vs MF               | 0.03                   | 1.000       | 0.03      |
| WMF vs CD              | 0.58                   | 0.100       | 1.45      |
| WMF vs FW              | 0.17                   | 1.000       | 0.30      |
| WMF vs FB              | 0.26                   | 1.000       | 0.60      |
| WMF vs MF              | 0.21                   | 0.216       | 0.23      |
| FB vs CD               | 0.32                   | 0.115       | 0.86      |
| FB vs FW               | -0.09                  | 1.000       | 0.15      |
| FB vs WMF              | -0.26                  | 1.000       | 0.60      |
| FB vs MF               | -0.05                  | 1.000       | 0.06      |
| MF vs CD               | 0.37                   | 0.804       | 0.42      |
| MF vs FW               | -0.03                  | 1.000       | 0.03      |
| MF vs WMF              | -0.21                  | 0.216       | 0.23      |
| MF vs FB               | 0.05                   | 1.000       | 0.06      |



### V<sub>MAX</sub> descriptive statistics

| <b>Position</b> | <b>N</b> | <b>Mean</b> | <b>SD</b> |
|-----------------|----------|-------------|-----------|
| CD              | 24       | 30.57       | 1.42      |
| FW              | 24       | 29.96       | 2.02      |
| WMF             | 24       | 32.04       | 1.58      |
| FB              | 22       | 30.68       | 1.60      |
| MF              | 26       | 28.53       | 1.66      |

### V<sub>MAX</sub> multiple comparisons

| <b>Position Groups</b> | <b>Mean difference</b> | <b>Sig.</b> | <b>ES</b> |
|------------------------|------------------------|-------------|-----------|
| CD vs FW               | 0.61                   | 1.000       | 0.35      |
| CD vs WMF              | -1.47                  | 0.028       | 0.98      |
| CD vs FB               | -0.11                  | 1.000       | 0.07      |
| CD vs MF               | 2.03                   | 0.001       | 1.31      |
| FW vs CD               | -0.61                  | 1.000       | 0.35      |
| FW vs WMF              | -2.08                  | 0.001       | 1.15      |
| FW vs FB               | -0.72                  | 1.000       | 0.39      |
| FW vs MF               | 1.42                   | 0.031       | 0.77      |
| WMF vs CD              | 1.47                   | 0.028       | 0.98      |
| WMF vs FW              | 2.08                   | 0.001       | 1.15      |
| WMF vs FB              | 1.36                   | 0.066       | 0.86      |
| WMF vs MF              | 3.50                   | 0.001       | 2.16      |
| FB vs CD               | 0.11                   | 1.000       | 0.07      |
| FB vs FW               | 0.72                   | 1.000       | 0.39      |
| FB vs WMF              | -1.36                  | 0.066       | 0.86      |
| FB vs MF               | 2.14                   | 0.001       | 1.31      |
| MF vs CD               | -2.03                  | 0.001       | 1.31      |
| MF vs FW               | -1.42                  | 0.031       | 0.77      |
| MF vs WMF              | -3.50                  | 0.001       | 2.16      |
| MF vs FB               | -2.14                  | 0.001       | 1.31      |

**Low-intensity accelerations and high-intensity accelerations (Vo)**

| <b>Position</b> | <b>N</b> | <b>Mean Low</b> | <b>SD Low</b> | <b>Mean High</b> | <b>SD High</b> | <b>Sig.</b> | <b>ES</b> |
|-----------------|----------|-----------------|---------------|------------------|----------------|-------------|-----------|
| CD              | 24       | 5.49            | 3.23          | 5.46             | 2.96           | 0.29        | 0.01      |
| FW              | 24       | 6.11            | 3.39          | 5.68             | 3.18           | 0.01        | 0.13      |
| WMF             | 24       | 6.17            | 3.59          | 5.75             | 3.19           | 0.01        | 0.12      |
| FB              | 22       | 6.01            | 3.45          | 6.24             | 3.20           | 0.35        | 0.07      |
| MF              | 26       | 6.03            | 3.20          | 5.84             | 3.04           | 0.30        | 0.06      |

**Low-intensity decelerations and high-intensity decelerations (Vo)**

| <b>Position</b> | <b>N</b> | <b>Mean Low</b> | <b>SD Low</b> | <b>Mean High</b> | <b>SD High</b> | <b>Sig.</b> | <b>ES</b> |
|-----------------|----------|-----------------|---------------|------------------|----------------|-------------|-----------|
| CD              | 24       | 12.36           | 4.73          | 16.43            | 5.49           | 0.001       | 0.79      |
| FW              | 24       | 13.63           | 5.11          | 16.93            | 5.24           | 0.001       | 0.63      |
| WMF             | 24       | 13.24           | 5.47          | 17.49            | 5.75           | 0.001       | 0.76      |
| FB              | 22       | 13.11           | 5.28          | 17.03            | 5.74           | 0.001       | 0.71      |
| MF              | 26       | 12.59           | 4.63          | 15.24            | 4.72           | 0.001       | 0.57      |
